# Supplementary material for: Environmental Temperature, Other Climatic Variables, and Cardiometabolic Profile in Acute Myocardial Infarction
Source: MDPI journal article supplement (doi:10.3390/jcm13072098), 2024-04-03
Supplement: s1 [file s1]

**Supplementary Table S1.** Percentile values for the whole warm period for Lunigiana

| perc | Tmin | Tmax | Tmean | RH   | Wind  | Mslp  |
|------|------|------|-------|------|-------|-------|
|      | (°C) | (°C) | (°C)  | (%)  | (m/s) | (hPa) |
| 0.75 | 16.1 | 29.8 | 22.7  | 15.0 | 81.4  | 1.8   |
| 0.25 | 13.8 | 26.1 | 19.9  | 12.9 | 74.7  | 1.5   |

**Supplementary Table S2.** Percentile values for the whole cold period for Lunigiana

| perc | Tmin | Tmax | Tmean | RH   | Wind  | Mslp  |
|------|------|------|-------|------|-------|-------|
|      | (°C) | (°C) | (°C)  | (%)  | (m/s) | (hPa) |
| 0.75 | 7.5  | 16.3 | 11.7  | 12.4 | 87.6  | 2.3   |
| 0.25 | 4.4  | 13.4 | 9.0   | 9.0  | 78.7  | 1.6   |

**Supplementary Table S3.** Percentile values for the whole warm period for Versilia

| perc | Tmin | Tmax | Tmean | RH   | Wind  | Mslp  |
|------|------|------|-------|------|-------|-------|
|      | (°C) | (°C) | (°C)  | (%)  | (m/s) | (hPa) |
| 0.75 | 19.2 | 29.1 | 24.2  | 10.9 | 75.8  | 1.7   |
| 0.25 | 16.9 | 26.2 | 21.5  | 9.6  | 70.4  | 1.3   |

**Supplementary Table S4.** Percentile values for the whole cold period for Versilia

| perc | Tmin | Tmax | Tmean | RH   | Wind  | Mslp  |
|------|------|------|-------|------|-------|-------|
|      | (°C) | (°C) | (°C)  | (%)  | (m/s) | (hPa) |
| 0.75 | 9.8  | 17.3 | 13.4  | 10.2 | 81.6  | 1.8   |
| 0.25 | 7.0  | 15.0 | 11.1  | 8.4  | 75.5  | 1.3   |

**Supplementary Table S5.** Percentile values for the warm period for Massa Carrara

| perc | Tmin | Tmax | Tmean | RH   | Wind  | Mslp  |
|------|------|------|-------|------|-------|-------|
|      | (°C) | (°C) | (°C)  | (%)  | (m/s) | (hPa) |
| 0.75 | 19.5 | 29.6 | 24.5  | 11.1 | 74.7  | 1.7   |
| 0.25 | 17.2 | 26.7 | 21.9  | 9.8  | 68.8  | 1.4   |

**Supplementary Table S6.** Percentile values for the cold period for Massa Carrara

| perc | Tmin<br>(°C) | Tmax<br>(°C) | Tmean<br>(°C) | RH<br>(%) | Wind<br>(m/s) | Mslp<br>(hPa) |
|------|--------------|--------------|---------------|-----------|---------------|---------------|
| 0.75 | 9.9          | 17.6         | 13.6          | 10.1      | 79.7          | 1.9           |
| 0.25 | 7.3          | 15.3         | 11.4          | 8.4       | 73.1          | 1.4           |

**Supplementary Table S7.** Percentile values for each month of the whole warm period for Lunigiana

|      | perc. | Tmin<br>(°C) | Tmax<br>(°C) | Tmean<br>(°C) | RH<br>(%) | Wind<br>(m/s) | Mslp<br>(hPa) |
|------|-------|--------------|--------------|---------------|-----------|---------------|---------------|
| May  | 0.75  | 12.5         | 24.8         | 18.2          | 81.6      | 1.9           | 1017.0        |
|      | 0.25  | 9.0          | 19.6         | 14.7          | 66.0      | 1.3           | 1008.5        |
| June | 0.75  | 15.9         | 29.6         | 22.4          | 79.6      | 1.7           | 1017.0        |
|      | 0.25  | 12.9         | 24.4         | 18.9          | 68.4      | 1.3           | 1008.8        |
| July | 0.75  | 17.8         | 31.8         | 24.6          | 76.9      | 1.7           | 1016.4        |
|      | 0.25  | 14.7         | 28.2         | 21.6          | 65.8      | 1.3           | 1006.4        |
| Aug  | 0.75  | 17.6         | 32.1         | 24.7          | 78.4      | 1.7           | 1016.3        |
|      | 0.25  | 14.8         | 27.9         | 21.7          | 61.6      | 1.2           | 1001.7        |
| Sep  | 0.75  | 15.5         | 28.0         | 21.4          | 82.8      | 1.9           | 1017.4        |
|      | 0.25  | 11.5         | 23.4         | 17.7          | 68.1      | 1.3           | 1004.2        |
| Oct  | 0.75  | 12.7         | 22.6         | 17.4          | 88.4      | 2.0           | 1019.8        |
|      | 0.25  | 7.5          | 18.0         | 13.1          | 73.6      | 1.1           | 1007.7        |

**Supplementary Table S8.** Percentile values for each month of the whole cold period for Lunigiana

|     | perc. | Tmin<br>(°C) | Tmax<br>(°C) | Tmean<br>(°C) | RH<br>(%) | Wind<br>(m/s) | Mslp<br>(hPa) |
|-----|-------|--------------|--------------|---------------|-----------|---------------|---------------|
| Nov | 0.75  | 9.7          | 17.1         | 13.1          | 90.2      | 2.3           | 1020.2        |
|     | 0.25  | 4.1          | 12.9         | 8.7           | 76.0      | 1.2           | 1005.0        |
| Dec | 0.75  | 5.6          | 13.2         | 9.2           | 92.4      | 2.1           | 1025.2        |
|     | 0.25  | 0.2          | 9.4          | 5.3           | 71.4      | 1.1           | 1008.1        |
| Jan | 0.75  | 7.1          | 14.0         | 10.3          | 83.6      | 1.7           | 1022.4        |

|     |      |      |      |      |      |     |        |
|-----|------|------|------|------|------|-----|--------|
|     | 0.25 | 2.5  | 11.0 | 7.0  | 68.5 | 0.9 | 1008.0 |
| Feb | 0.75 | 7.4  | 15.0 | 11.0 | 81.4 | 1.8 | 1021.6 |
|     | 0.25 | 3.0  | 11.9 | 8.0  | 64.9 | 0.9 | 1006.5 |
| Mar | 0.75 | 8.6  | 17.3 | 12.7 | 78.6 | 1.9 | 1020.4 |
|     | 0.25 | 5.2  | 14.3 | 10.0 | 59.4 | 1.0 | 1004.7 |
| Apr | 0.75 | 11.6 | 21.0 | 15.9 | 77.0 | 1.8 | 1017.2 |
|     | 0.25 | 8.5  | 17.2 | 13.1 | 61.7 | 1.0 | 1004.1 |

**Supplementary Table S9.** Percentile values for each month of the whole warm period for Versilia

|      | perc. | Tmin<br>(°C) | Tmax<br>(°C) | Tmean<br>(°C) | RH<br>(%) | Wind<br>(m/s) | Mslp<br>(hPa) |
|------|-------|--------------|--------------|---------------|-----------|---------------|---------------|
| May  | 0.75  | 14.8         | 24.3         | 19.3          | 77.1      | 1.7           | 1016.8        |
|      | 0.25  | 11.8         | 20.4         | 16.2          | 64.4      | 1.1           | 1007.7        |
| June | 0.75  | 18.7         | 28.9         | 23.8          | 76.4      | 1.7           | 1016.9        |
|      | 0.25  | 15.9         | 24.7         | 20.3          | 64.5      | 1.1           | 1008.6        |
| July | 0.75  | 20.9         | 30.9         | 25.8          | 72.8      | 1.7           | 1016.5        |
|      | 0.25  | 18.3         | 28.1         | 23.3          | 63.1      | 1.1           | 998.6         |
| Aug  | 0.75  | 20.7         | 30.9         | 25.7          | 72.5      | 1.7           | 1016.3        |
|      | 0.25  | 18.3         | 28.1         | 23.3          | 61.4      | 1.0           | 994.0         |
| Sep  | 0.75  | 18.1         | 27.7         | 22.9          | 76.0      | 1.7           | 1017.6        |
|      | 0.25  | 14.4         | 24.3         | 19.7          | 63.5      | 1.0           | 1003.1        |
| Oct  | 0.75  | 15.0         | 23.4         | 19.1          | 80.2      | 1.6           | 1020.1        |
|      | 0.25  | 10.5         | 19.9         | 15.5          | 69.2      | 0.9           | 1006.0        |

**Supplementary Table S10.** Percentile values for each month of the whole cold period for Versilia

|     | perc. | Tmin<br>(°C) | Tmax<br>(°C) | Tmean<br>(°C) | RH<br>(%) | Wind<br>(m/s) | Mslp<br>(hPa) |
|-----|-------|--------------|--------------|---------------|-----------|---------------|---------------|
| Nov | 0.75  | 12.0         | 18.9         | 15.4          | 82.2      | 1.9           | 1020.3        |
|     | 0.25  | 6.8          | 15.4         | 11.0          | 70.6      | 0.9           | 1004.1        |
| Dec | 0.75  | 8.4          | 15.0         | 11.6          | 84.4      | 1.8           | 1025.0        |
|     | 0.25  | 3.0          | 11.9         | 7.7           | 70.1      | 0.9           | 1008.2        |

|     |      |      |      |      |      |     |        |
|-----|------|------|------|------|------|-----|--------|
| Jan | 0.75 | 7.1  | 14.0 | 10.3 | 83.6 | 1.7 | 1022.4 |
|     | 0.25 | 2.5  | 11.0 | 7.0  | 68.5 | 0.9 | 1008.0 |
| Feb | 0.75 | 7.4  | 15.0 | 11.0 | 81.4 | 1.8 | 1021.6 |
|     | 0.25 | 3.0  | 11.9 | 8.0  | 64.9 | 0.9 | 1006.5 |
| Mar | 0.75 | 8.6  | 17.3 | 12.7 | 78.6 | 1.9 | 1020.4 |
|     | 0.25 | 5.2  | 14.3 | 10.0 | 59.4 | 1.0 | 1004.7 |
| Apr | 0.75 | 11.6 | 21.0 | 15.9 | 77.0 | 1.8 | 1017.2 |
|     | 0.25 | 8.5  | 17.2 | 13.1 | 61.7 | 1.0 | 1004.1 |

**Supplementary Table S11.** Percentile values for each month of the warm period for Massa Carrara

|      | perc. | Tmin<br>(°C) | Tmax<br>(°C) | Tmean<br>(°C) | RH<br>(%) | Wind<br>(m/s) | Mslp<br>(hPa) |
|------|-------|--------------|--------------|---------------|-----------|---------------|---------------|
| May  | 0.75  | 15.2         | 24.7         | 19.7          | 75.8      | 1.7           | 1017.0        |
|      | 0.25  | 12.2         | 20.9         | 16.6          | 60.3      | 1.2           | 1007.9        |
| June | 0.75  | 19.0         | 29.1         | 24.0          | 75.1      | 1.7           | 1016.9        |
|      | 0.25  | 16.2         | 25.2         | 20.6          | 62.6      | 1.2           | 1008.6        |
| July | 0.75  | 21.2         | 31.4         | 26.2          | 71.5      | 1.7           | 1016.4        |
|      | 0.25  | 18.7         | 28.4         | 23.7          | 61.0      | 1.2           | 1003.3        |
| Aug  | 0.75  | 21.0         | 31.4         | 26.1          | 71.3      | 1.7           | 1016.3        |
|      | 0.25  | 18.7         | 28.4         | 23.7          | 58.7      | 1.2           | 997.9         |
| Sep  | 0.75  | 18.5         | 28.3         | 23.4          | 74.6      | 1.7           | 1017.4        |
|      | 0.25  | 15.1         | 24.9         | 20.2          | 60.9      | 1.2           | 1002.9        |
| Oct  | 0.75  | 15.3         | 23.9         | 19.5          | 78.9      | 1.7           | 1020.0        |
|      | 0.25  | 10.9         | 20.3         | 15.8          | 66.1      | 1.1           | 1006.6        |

**Supplementary Table S12.** Percentile values for each month of the whole cold period for Massa Carrara

|     | perc. | Tmin<br>(°C) | Tmax<br>(°C) | Tmean<br>(°C) | RH<br>(%) | Wind<br>(m/s) | Mslp<br>(hPa) |
|-----|-------|--------------|--------------|---------------|-----------|---------------|---------------|
| Nov | 0.75  | 12.3         | 19.2         | 15.5          | 80.8      | 1.9           | 1020.3        |
|     | 0.25  | 7.3          | 15.8         | 11.6          | 68.1      | 1.0           | 1004.5        |
| Dec | 0.75  | 8.6          | 15.3         | 11.9          | 82.6      | 1.7           | 1025.0        |
|     | 0.25  | 3.6          | 12.1         | 8.1           | 66.2      | 1.0           | 1008.0        |
| Jan | 0.75  | 7.2          | 14.2         | 10.5          | 81.7      | 1.9           | 1022.3        |
|     | 0.25  | 3.1          | 11.2         | 7.2           | 64.7      | 1.0           | 1008.1        |

|     |      |      |      |      |      |     |        |
|-----|------|------|------|------|------|-----|--------|
| Feb | 0.75 | 7.4  | 15.3 | 11.2 | 79.4 | 1.9 | 1021.7 |
|     | 0.25 | 3.4  | 12.2 | 8.2  | 61.1 | 1.1 | 1006.5 |
| Mar | 0.75 | 8.9  | 17.6 | 13.0 | 77.6 | 2.0 | 1020.4 |
|     | 0.25 | 5.5  | 14.5 | 10.3 | 54.8 | 1.2 | 1004.9 |
| Apr | 0.75 | 11.9 | 21.4 | 16.3 | 75.8 | 1.9 | 1017.2 |
|     | 0.25 | 8.8  | 17.5 | 13.4 | 57.7 | 1.2 | 1004.3 |
